# Supplementary material
Source: PubMed Central journal article supplement (PMC373485)
Supplement: pnas_0400268101_4.pdf [file pnas_0400268101_4.pdf]

**EXON 1/EXON 1a**

Mobn2 acttgacaaccagcatgcccgagATG/-----  
AK031440 acttgacaaccagcatgcccgagatg/atcaacaaaagagattcttgggtcctagagaccaag

**EXON 1a/EXON 2**

Mobn2 ----- GCA  
AK031440 aaagaatcagcaggaaggcccagggtgaatgATG GAT TGC AGA GCC TGG CTG/GCA

Mobn2 CGT TTT GTG CCC TCC CCG CCT CCA AAT TGC CTC AGT TAC AAA TCA GAG  
AK031440 CGT TTT GTG CCC TCC CCG CCT CCA AAT TGC CTC AGT TAC AAA TCA GAG

Mobn2 GGC AGG CTT GGT GAG CAA GAC TGG CAA GCA CAT TTT AAG GTC CCG TGC  
AK031440 GGC AGG CTT GGT GAG CAA GAC TGG CAA GCA CAT TTT AAG GTC CCG TGC

**EXON 2/EXON 2a**

Mobn2 TGT GGG GTT GAT CCA TCT CAA CTT GAG --- --- --- --- ---  
AK031440 TGT GGG GTT GAT CCA TCT CAA CTT GAG/ TCA GAA GAG GCA GAA GTG GAT

Mobn2 --- --- --- --- --- --- --- --- --- --- --- --- --- --- ---  
AK031440 GTG AGA GAA AGA GAC ACA CAG AGA GAC AGA GAG CCA AAG AGG GCA AGA

Mobn2 --- --- --- --- --- --- --- --- --- --- --- --- --- --- ---  
AK031440 GAC TTG ACT TTA AGA GAC TCC TGT ACT GAC AAC TCC ATG CAG ATC GGA

Mobn2 --- --- --- --- --- --- --- --- --- --- --- --- --- --- ---  
AK031440 ACC AGA ACA ACT GCG GCT GAA CCA GGG TTG GGG ACA TGG CAA AAC GCT

**EXON 2a/EXON 3**

Mobn2 --- --- --- --- --- --- --- --- --- --- --- /GCC ATC CGC TGC ACA  
AK031440 GAC ACT AAC CTC TTA TTC AGA ATG TCC CAA CAG /GCC ATC CGC TGC ACA

Mobn2 TTG GTA AAC TGC ACG TGT GAG TGT TTC CAG CCT GGG AAG ATT AAC CTG  
AK031440 TTG GTA AAC TGC ACG TGT GAG TGT TTC CAG CCT GGG AAG ATT AAC CTG

**EXON 3/EXON 4**

Mobn2 CGG ACG TGT GAT CAG TGT AAA CAT GGC TGG GTG GCA CAT G/CC TTG GAT  
AK031440 CGG ACG TGT GAT CAG TGT AAA CAT GGC TGG GTG GCA CAT G/CC TTG GAT

Mobn2 AAA CTC AGC ACA CAG CAC CTG TAC CAC CCC ACT CAA GTG GAG ATT GTG  
AK031440 AAA CTC AGC ACA CAG CAC CTG TAC CAC CCC ACT CAA GTG GAG ATT GTG

Mobn2 CAG TCC AAC GTG GTG TTT GAC ATC AGC AGC CTG ATG CTC TAC GGG ACG  
AK031440 CAG TCC AAC GTG GTG TTT GAC ATC AGC AGC CTG ATG CTC TAC GGG ACG

Mobn2 CAG GCA GTG CCT GTG CGG CTA AAG ATA CTG CTA GAC CGG CTC TTC AGT  
AK031440 CAG GCA GTG CCT GTG CGG CTA AAG ATA CTG CTA GAC CGG CTC TTC AGT

Mobn2 GTC CTG AAG CAA GAG GAA GTG CTG CAC ATA CTA CAT GGC TTG GGC TGG  
AK031440 GTC CTG AAG CAA GGG GAA GTG CTG CAC ATA CTA CAT GGC TTG GGC TGG

Mobn2 ACC CTG AGG GAC TAT GTC CGA GGA TAC ATC CTT CAG/EXON 5  
AK031440 ACC CTG AGG GAC TAT GTC CGA GGA TAC ATC CTT CAG..INTRON IV
