# Supplementary material
Source: PubMed Central journal article supplement (PMC373485)

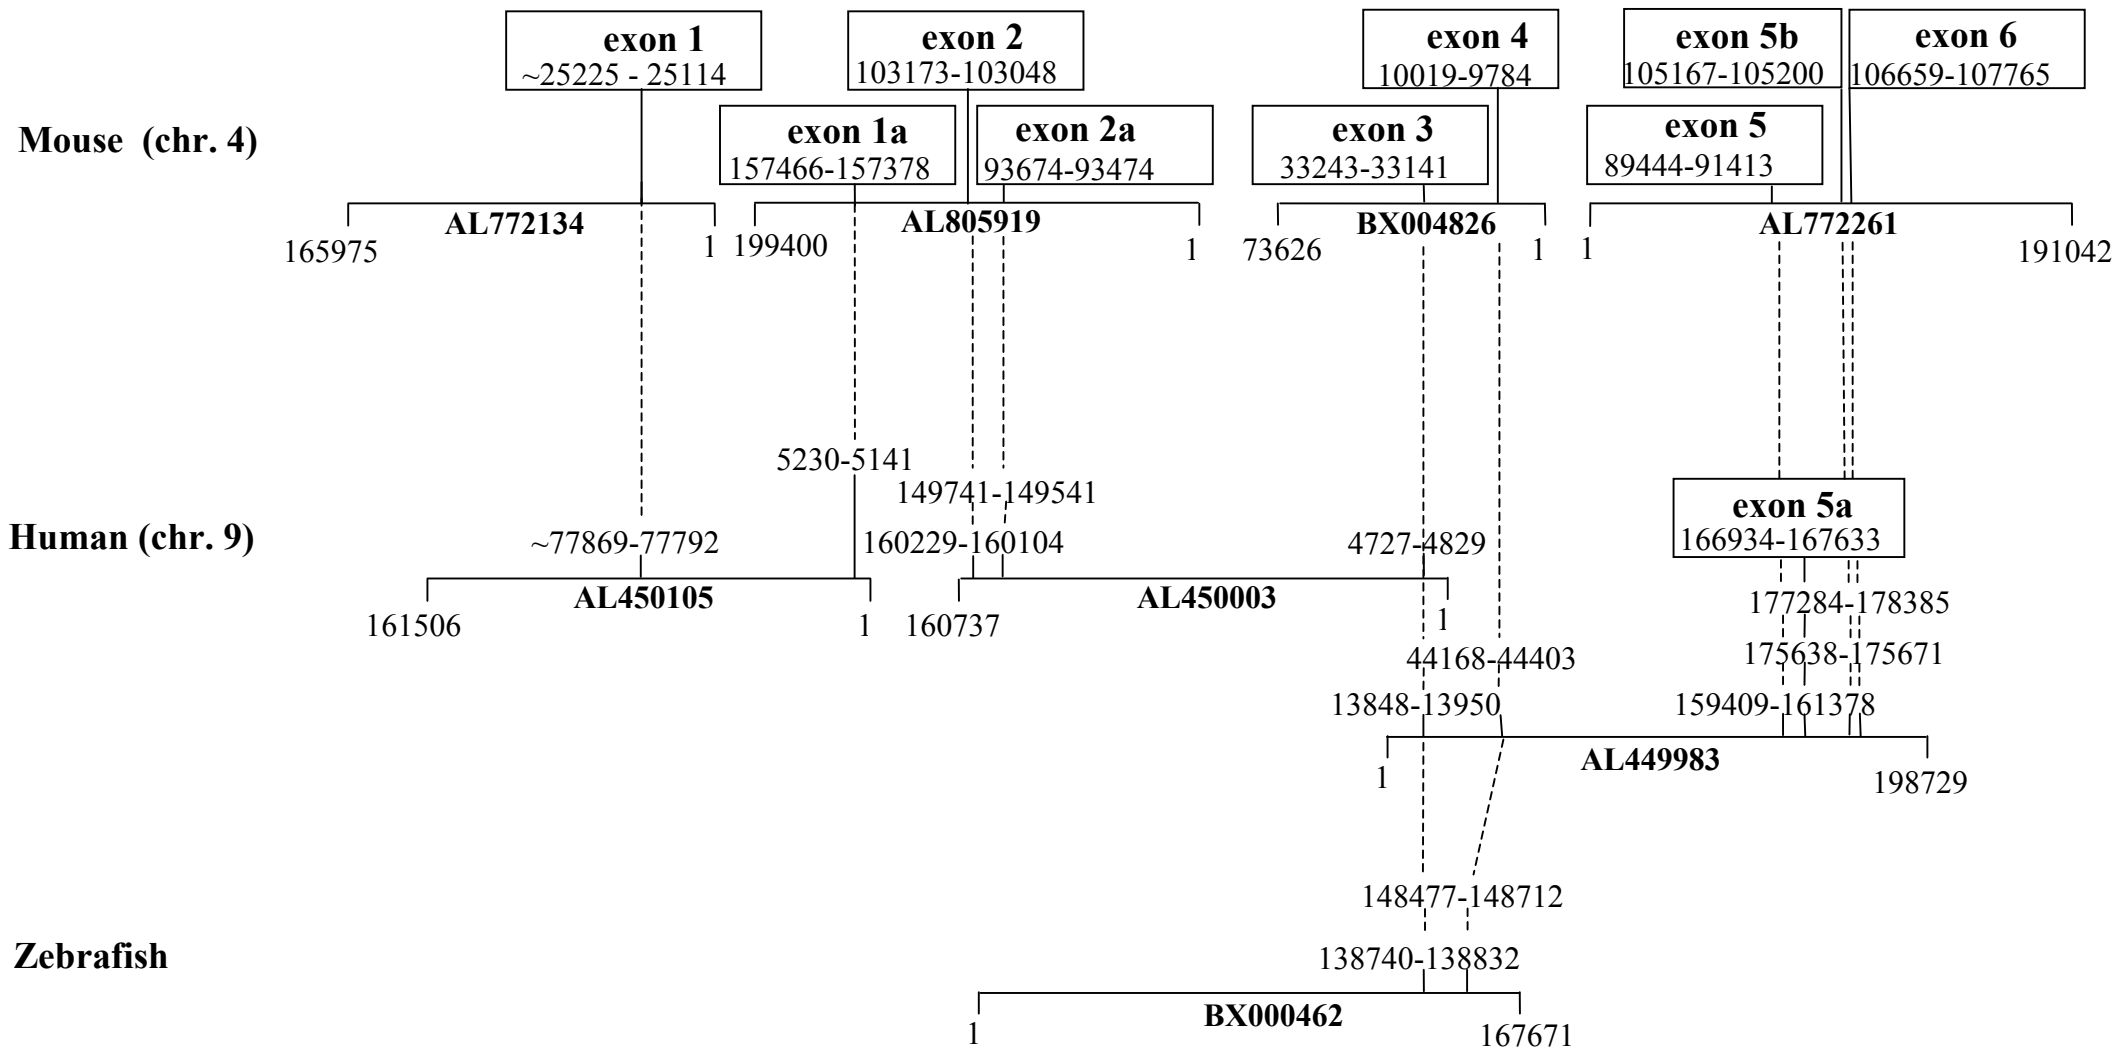

Supplement: pnas_0400268101_2.pdf [file pnas_0400268101_2.pdf]
